# Supplementary material for: Heat treatment of ZnO nanoparticles: new methods to achieve high-purity nanoparticles for high-voltage applications
Source: Royal Society of Chemistry journal article supplement (doi:10.1039/c5ta03120f), 2015-01-01
Supplement: c5ta03120f1.pdf [file c5ta03120f1.pdf]

Submitted to *J. Mater. Chem. A*

## Supplementary information

Heat treatment of ZnO nanoparticles: new methods to achieve  
high-purity nanoparticles for high-voltage applications

A. M. Pourrahimi<sup>a</sup>, D. Liu<sup>a</sup>, V. Ström<sup>b</sup>, M. S. Hedenqvist<sup>a</sup>, R. T. Olsson<sup>a</sup>,  
U.W. Gedde <sup>a\*</sup>

<sup>a</sup>KTH Royal Institute of Technology, School of Chemical Science and Engineering,  
Fibre and Polymer Technology, SE-100 44 Stockholm, Sweden

<sup>b</sup>KTH Royal Institute of Technology, School of Industrial Engineering and Management,  
Material Science and Engineering, SE-100 44 Stockholm, Sweden

\* Corresponding author. Tel.: +46 8 790 7640. Fax: +46 8 208856.

E-mail address: [gedde@kth.se](mailto:gedde@kth.se)

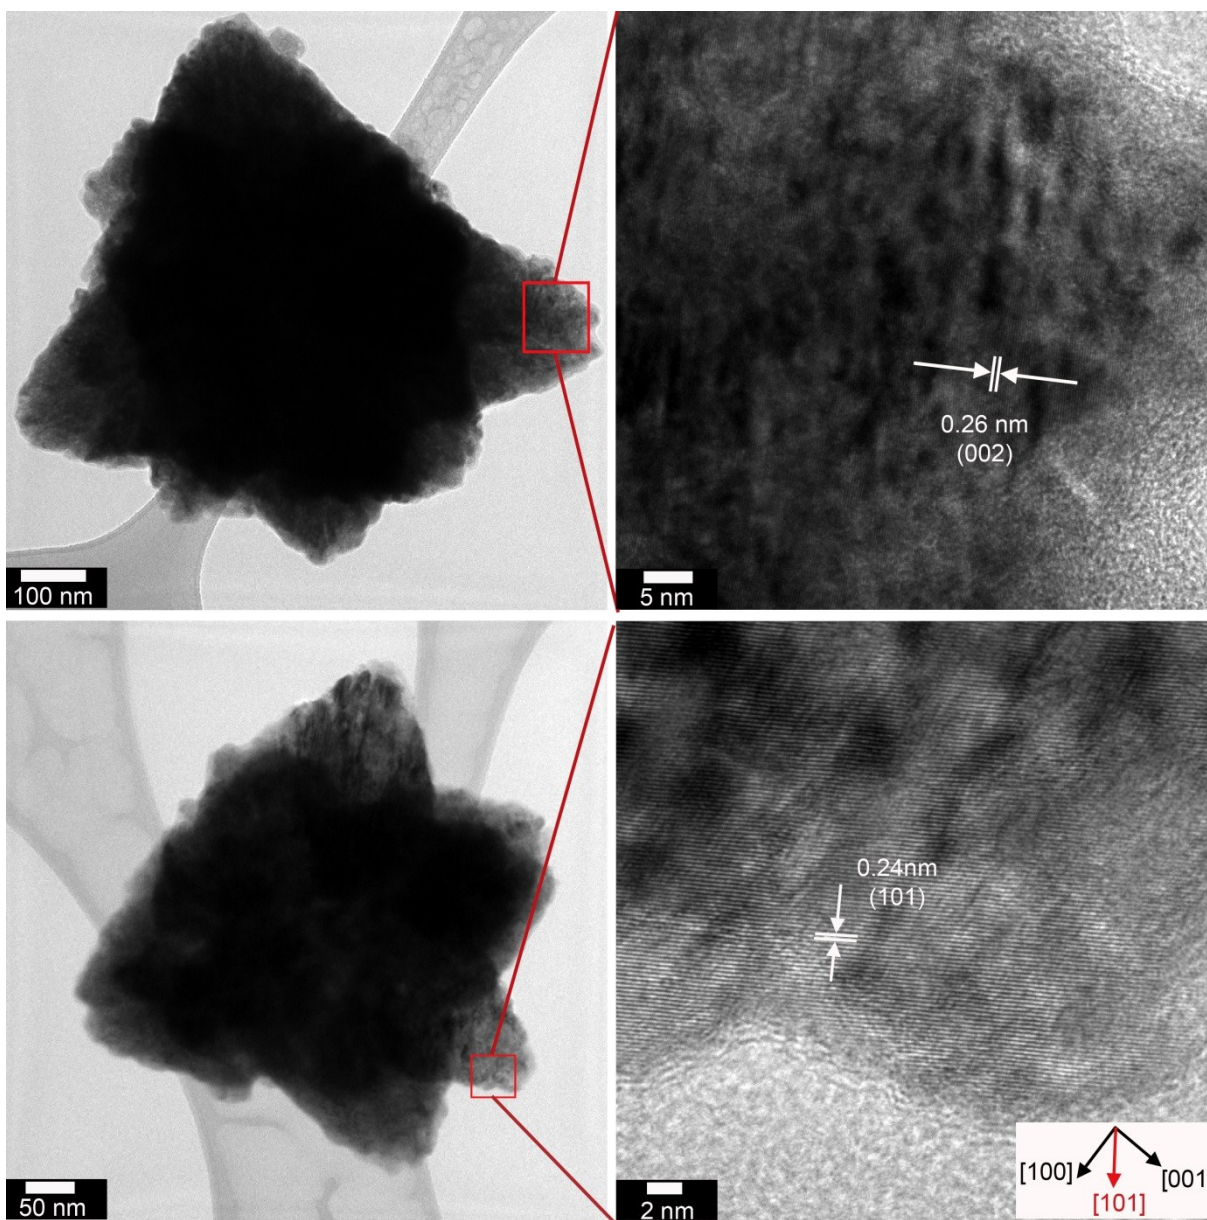

**Fig. S1** High resolution TEM of precipitated single flower-shaped ZnO particle (ZN-8g) confirming the c-axis orientation of primary nanoparticles.
